# Supplementary material for: Outcome of patients with acute myeloid leukemia following failure of frontline venetoclax plus hypomethylating agent therapy
Source: PubMed Central journal article supplement — Haematologica. 2023 Mar 2;108(11):3170–4. doi: 10.3324/haematol.2022.282677 (PMC10620560; doi:10.3324/haematol.2022.282677), 2023-03-02
Supplement: 2022_282677_GANGAT_SUPPL.pdf [file 2022_282677_GANGAT_SUPPL.pdf]

# Outcome of patients with acute myeloid leukemia following failure of frontline venetoclax plus hypomethylating agent therapy

Naseema Gangat,\* Rimal Ilyas,\* Isla M. Johnson, Kristen McCullough, Aref Al-Kali, Hassan B. Alkhateeb, Kebede H. Begna, Abhishek Mangaonkar, Mark R Litzow, William Hogan, Mithun Shah, Mrinal M. Patnaik, Animesh Pardanani and Ayalew Tefferi

Division of Hematology, Mayo Clinic, Rochester, MN, USA

*\*NG and RI contributed equally as first authors.*

Correspondence:

N. GANGAT - [gangat.naseema@mayo.edu](mailto:gangat.naseema@mayo.edu).

<https://doi.org/10.3324/haematol.2022.282677>

Supplemental Table 1. Clinical characteristics at time of treatment with venetoclax and hypomethylating agent (HMA) for 103 patients with treatment naïve acute myeloid leukemia stratified by treatment response to venetoclax and HMA

| Variables                                            | All patients<br>n=103 | Patients with<br>relapsed or<br>refractory disease<br>n=71 | Patients without<br>relapse or refractory<br>disease<br>n=32 | P-value      |
|------------------------------------------------------|-----------------------|------------------------------------------------------------|--------------------------------------------------------------|--------------|
| Age in years, median (range)                         | 74 (36-92)            | 74(37-91)                                                  | 72 (52-86)                                                   | 0.84         |
| Male, n (%)                                          | 69 (67)               | 50(70)                                                     | 19 (59)                                                      | 0.27         |
| AML type, n (%)                                      |                       |                                                            |                                                              |              |
| - <i>De novo</i>                                     | 64 (62)               | 43 (61)                                                    | 23 (72)                                                      | 0.26         |
| - Secondary or therapy-related                       | 39 (38)               | 28 (40)                                                    | 9 (28)                                                       |              |
| Hemoglobin, g/dl, median (range)                     | 8.6 (4.8-14)          | 8.6(5.1-14)                                                | 8.6 (4.8-13.6)                                               | 0.58         |
| Leukocyte count x 10 <sup>9</sup> /L, median (range) | 3.6 (0.1-116)         | 4.4(0.5-117)                                               | 2.9 (0.1-95)                                                 | 0.79         |
| Platelet count x 10 <sup>9</sup> /L, median (range)  | 59.5 (7-444)          | 60(7-444)                                                  | 52 (9-212)                                                   | 0.76         |
| Circulating blasts %, median (range)                 | 14 (0-93)             | 14(0-92)                                                   | 11 (0-93)                                                    | 0.39         |
| Bone marrow blasts %, median (range)                 | 48 (2-97)             | 48(20-95)                                                  | 40 (2-97)                                                    | 0.33         |
| 2017 ELN cytogenetic risk stratification, n (%)      |                       |                                                            |                                                              |              |
| -Favorable                                           | 5 (5)                 | 0                                                          | 5 (16)                                                       | <b>0.15</b>  |
| -Intermediate                                        | 52 (50)               | 36 (51)                                                    | 16 (50)                                                      |              |
| -Adverse                                             | 46 (45)               | 35 (49)                                                    | 11 (34)                                                      |              |
| Mutations, n (%)                                     |                       |                                                            |                                                              |              |
| - <i>TP53</i>                                        | 25 (25)               | 23 (32)                                                    | 2 (6)                                                        | <b>0.002</b> |
| - <i>ASXL1</i>                                       | 18 (18)               | 12 (17)                                                    | 6 (19)                                                       | 0.82         |
| - <i>RUNX1</i>                                       | 19 (19)               | 13 (18)                                                    | 6 (19)                                                       | 0.96         |
| - <i>TET2</i>                                        | 24 (23)               | 18 (25)                                                    | 6 (19)                                                       | 0.46         |
| - <i>SRSF2</i>                                       | 18 (18)               | 12 (17)                                                    | 6 (19)                                                       | 0.82         |
| - <i>IDH1/IDH2</i>                                   | 20 (19)               | 11 (16)                                                    | 9 (28)                                                       | 0.23         |
| - <i>NPM1</i>                                        | 13 (13)               | 7 (10)                                                     | 6 (19)                                                       | 0.45         |
| - <i>K/NRAS</i>                                      | 15 (15)               | 9 (13)                                                     | 6 (19)                                                       | 0.43         |
| - <i>FLT3-ITD</i>                                    | 10 (10)               | 10 (14)                                                    | 0 (0)                                                        | <b>0.005</b> |
| HMA used, n (%)                                      |                       |                                                            |                                                              |              |
| - Azacitidine                                        | 39 (38)               | 26 (36)                                                    | 13 (41)                                                      | 0.69         |
| - Decitabine                                         | 64 (62)               | 45 (63)                                                    | 19 (59)                                                      |              |
| Final dose of venetoclax, mg, (median, range)        | 200 (50-400)          | 200 (50-400)                                               | 200 (100-400)                                                | 0.91         |

ELN- European Leukemia Net
